# Supplementary material for: The early effects of external and internal strategies on working memory updating training
Source: PubMed Central journal article supplement (PMC5840432; doi:10.1038/s41598-018-22396-5), 2018-03-06
Supplement: 41598_2018_22396_MOESM1_ESM.pdf [file 41598_2018_22396_MOESM1_ESM.pdf]

## **Supplementary information**

### **The early effects of external and internal strategies on working memory updating training**

Matti Laine<sup>1,2\*</sup>, Daniel Fellman<sup>1</sup>, Otto Waris<sup>1</sup>, & Thomas J. Nyman<sup>1</sup>

<sup>1</sup>Department of Psychology, Åbo Akademi University, Turku, Finland. <sup>2</sup>Turku Brain and Mind Center, University of Turku, Finland. Correspondence and requests for materials should be addressed to M.L. (email [matlaine@abo.fi](mailto:matlaine@abo.fi))

**Supplementary Table S1 online**

**Classification scheme for strategy types based on participants' self-reports at posttest.  
The examples were created as an aid for the independent raters.**

| <b>Strategies</b>       | <b>Examples</b>                                                                                                                                                                                          |
|-------------------------|----------------------------------------------------------------------------------------------------------------------------------------------------------------------------------------------------------|
| Rehearsal               | <ul style="list-style-type: none"> <li>• “I repeated the digits silently in my mind”</li> <li>• “I repeated a list of letters in my mind”</li> </ul>                                                     |
| Grouping                | <ul style="list-style-type: none"> <li>• “I created groups of 3 digits”</li> <li>• “I grouped the letters in pairs”</li> </ul>                                                                           |
| Updating                | <ul style="list-style-type: none"> <li>• “I created a group of digits in my mind and dropped the last digit when a new digit appeared”</li> </ul>                                                        |
| Grouping and comparison | <ul style="list-style-type: none"> <li>• “I split the digits into different series, and compared those to each other”</li> </ul>                                                                         |
| Semantics               | <ul style="list-style-type: none"> <li>• “I created words from the letters (e.g., C-R-S = Corn – Rose – Sand)”</li> <li>• I converted the digits to melodies, e.g., 1356 = DO-MI-SO-LA”</li> </ul>       |
| Phonology               | <ul style="list-style-type: none"> <li>• “I made up lists based on first syllables of the digit words”<br/>[<i>n.b. the names for digits are multisyllabic in Finnish</i>]</li> </ul>                    |
| Imagery                 | <ul style="list-style-type: none"> <li>• “I tried to associate each digit with some image in my mind”</li> </ul>                                                                                         |
| Familiarity             | <ul style="list-style-type: none"> <li>• “I chose the letters that felt most familiar”</li> </ul>                                                                                                        |
| Guessing                | <ul style="list-style-type: none"> <li>• “I just used intuition”</li> <li>• “I started somewhere in the middle of the sequence, and did not memorize the first digits in the sequence at all”</li> </ul> |
| Other strategies        | <ul style="list-style-type: none"> <li>• “I made up a song based on the letters”</li> <li>• “I counted the digits with my fingers”</li> </ul>                                                            |
| No strategy use         | <ul style="list-style-type: none"> <li>• “I tried to keep all the digits in my mind”</li> <li>• “I put the [<i>visually presented</i>] digits in my visual memory”</li> </ul>                            |

### Supplementary Table S2 online

The frequency of occurrence of reported strategy types by the control participants (active and passive controls combined) in the three n-back tasks at posttest

| <b>Strategy</b>         | Trained n-back task |      | n-back task with letters |      | n-back task with colors |      |
|-------------------------|---------------------|------|--------------------------|------|-------------------------|------|
|                         | <i>n</i>            | %    | <i>n</i>                 | %    | <i>n</i>                | %    |
| No strategy             | 14                  | 18.4 | 22                       | 29.3 | 24                      | 32.0 |
| Rehearsal               | 18                  | 23.7 | 16                       | 21.3 | 25                      | 33.3 |
| Updating                | 7                   | 9.2  | 7                        | 9.3  | 6                       | 8.0  |
| Grouping                | 14                  | 18.4 | 7                        | 9.3  | 6                       | 8.0  |
| Grouping and comparison | 16                  | 21.1 | 14                       | 18.7 | 9                       | 12.0 |
| Semantics               | 0                   | 0.0  | 2                        | 2.7  | 1                       | 1.3  |
| Phonology               | 1                   | 1.3  | 2                        | 2.7  | 1                       | 1.3  |
| Imagery                 | 1                   | 1.3  | 1                        | 1.3  | 1                       | 1.3  |
| Familiarity             | 0                   | 0.0  | 1                        | 1.3  | 0                       | 0.0  |
| Guessing                | 1                   | 1.3  | 1                        | 1.3  | 1                       | 1.3  |
| Other strategy          | 4                   | 5.3  | 2                        | 2.7  | 1                       | 1.3  |
